# Supplementary material for: JUDUL INDONESIA:PROTOTYPE PROTEKSI ARUS LEBIHMENGGUNAKAN CURRENT TRANSFORMER BERBASISMIKROKONTROLLER ATMEGA32
Source: Springer Nature journal article supplement (doi:10.1186/s13023-023-03003-x), 2014-08-18
Supplement: MOESM5 [file 26583668]

## **Full case descriptions**

### ***Patient RP09***

The patient was a 71-year-old man who developed general fatigue and rashes on all limbs in 2020. Laboratory examination showed increased inflammatory markers, macrocellular anemia, and thrombocytopenia (Table E2). A chest CT scan showed interstitial changes in both lungs. Histopathologic evaluation of the bone marrow showed signs of vacuolization in myeloid and erythroid precursor cells.

### ***Patient RP13***

The patient presented in 2021 at 64 years of age with fever, palpitations, chest tightness, and fatigue. Serologic analyses showed high inflammatory parameters and macrocytic anemia. The chest CT scan showed pneumonia. After admission, he developed hypotension and dyspnea. Septic shock was considered. Two months later, the patient suddenly showed a decrease in heart rate and died after rescue attempts.

### ***Patient RP34***

The patient was a 45-year-old man who presented in 2019 with symptoms of fever, swelling and pain in the right ear. Laboratory examination showed increased inflammatory markers. The patient was treated with methylprednisolone (40 mg once a day), alfacalcidol (0.25 µg once a day), and loxoprofen sodium tablets (60 mg twice a day), and his symptoms subsequently improved.
