# Supplementary material for: Dynamic monitoring of UBA1 somatic mutations in patients with relapsing polychondritis
Source: Orphanet J Rare Dis. 2024 Jan 2;19:1. doi: 10.1186/s13023-023-03003-x (PMC10762806; doi:10.1186/s13023-023-03003-x)
Supplement: Supplementary file 1 — Additional file 1. Sequences of primers and probes used in this study. [file 13023_2023_3003_MOESM1_ESM.xls]

## Sheet: Sheet1
Additional file 1. Sequences of primers and probes used in this study
	Sequence
PCR primers for Sanger sequencing	5’-TGGGTGGGAAAGTCTTTTGT-3’(forward)
	5’-CTGCCAGGTTAGGGGGTACT-3’(reverse)
ddPCR primers	5’-TGTCTCCCTAAACTTGTTCT-3’(forward)
	5’-AGCTGCCGGGAGTAAAG-3’(reverse)
LNA probes	5’(HEX)-CTAGG+GA+A+TG+GCCA-3’(MGB) (c.121A>C and c.122T>C wild-type)
	5’(FAM)-CTAGGG+A+C+TGGCCA -3’(MGB) (c.121A>C variant)
	5’(FAM)-TAGGGA+A+C+GGCCAA -3’(MGB) (c.121T>C variant)
	5’(HEX)-TGGCC+A+C+TCCCTAG -3’(MGB) (c.121A>G wild-type)
	5’(FAM)-TAGGGA+A+C+GGCCAA -3’(MGB) (c.121A>G variant)
ddPCR, droplet digital PCR; LNA, locked nucleic acid.
