# Supplementary material for: Dynamic monitoring of UBA1 somatic mutations in patients with relapsing polychondritis
Source: Orphanet J Rare Dis. 2024 Jan 2;19:1. doi: 10.1186/s13023-023-03003-x (PMC10762806; doi:10.1186/s13023-023-03003-x)
Supplement: Supplementary file 2 — Additional file 2. Clinical features of patients with relapsing polychondritis and hematological abnormalities. [file 13023_2023_3003_MOESM2_ESM.xls]

## Sheet: Sheet1
Additional file 2. Clinical features of patients with relapsing polychondritis and hematological abnormalities
Patient	RP09	RP13	RP34	RP01	RP02	RP03	RP04	RP05	RP06	RP07	RP08	RP10	RP11	RP12	RP14	RP15	RP16	RP17	RP18	RP19	RP20	RP21	RP22	RP23	RP24	RP25	RP26	RP27	RP28	RP29	RP30	RP31	RP32	RP33	RP35	RP36	RP37	RP38	RP39	RP40	RP41	RP42	RP43	RP44
Demographics
Age	70	64	45	53	83	53	56	36	45	63	27	70	35	52	51	47	44	33	35	54	7	46	48	52	55	64	41	50	47	52	47	51	64	72	68	53	49	43	21	59	42	43	61	64
Sex	M	M	M	M	M	F	F	F	F	M	F	M	M	F	M	M	F	F	M	M	M	F	M	F	F	M	M	M	F	M	F	F	F	F	M	F	M	F	M	M	F	F	F	F
Age of onset (y)	69	64	42	53	81	47	54	35	43	60	22	68	34	51	45	46	43	32	32	53	5	45	48	51	55	64	39	42	44	52	47	51	64	67	67	53	42	35	14	53	40	43	61	64
Follow-up (y)	1	1	3	＜1	2	6	2	1	2	3	5	2	1	1	6	1	1	1	3	1	2	1	＜1	1	＜1	＜1	2	7	3	＜1	＜1	＜1	＜1	5	1	＜1	7	8	7	6	2	＜1	＜1	＜1
Status(alive/deceased)	Alive	deceased	Alive	Alive	Alive	Alive	Alive	Alive	Alive	Alive	Alive	Alive	Alive	Alive	Alive	Alive	Alive	Alive	Alive	Alive	Alive	Alive	Alive	Alive	Alive	Alive	Alive	Alive	Alive	Alive	Alive	Alive	Alive	Alive	Alive	Alive	Alive	Alive	Alive	Alive	Alive	Alive	Alive	Alive
Age at death (y)		64
Genetics
UBA1 (NM_0003334.3)	c.122T>C	c.122T>C	c.122T>C
Somatic variant	p(Met41Thr)	p(Met41Thr)	p(Met41Thr)
	VAF 73.75%	VAF 88.46%	VAF 1.02%
Clinical presentation
Auricular chondritis	Yes	Yes	Yes	Yes	Yes	No	No	Yes	Yes	No	Yes	No	No	Yes	Yes	Yes	No	Yes	Yes	No	Yes	Yes	Yes	No	Yes	No	Yes	Yes	Yes	Yes	No	Yes	No	Yes	Yes	No	No	No	Yes	No	No	No	Yes	Yes
Hearing loss	No	No	No	No	No	No	No	No	No	No	No	No	No	No	No	No	No	No	No	No	No	No	No	No	No	No	No	No	No	No	No	Yes	No	No	No	No	No	No	Yes	No	No	No	No	No
Nasal chondritis	Yes	No	No	No	No	Yes	No	No	No	No	No	Yes	No	No	No	No	No	No	No	No	No	No	No	No	No	No	No	No	No	No	No	No	No	No	No	No	Yes	Yes	No	Yes	No	No	Yes	No
Eye inflammation	No	No	Yes	Yes	No	Yes	No	No	Yes	No	No	No	No	No	Yes	No	No	No	No	No	No	No	No	No	No	No	No	Yes	No	No	No	Yes	No	Yes	No	Yes	No	Yes	Yes	No	No	No	Yes	No
Arthritis	No	No	No	No	No	Yes	No	Yes	Yes	No	No	Yes	No	No	No	No	No	No	No	No	No	Yes	Yes	Yes	Yes	No	No	Yes	No	No	No	No	No	No	No	No	No	Yes	No	No	No	No	No	No
Airway involvement	No	No	No	No	No	No	Yes	No	No	Yes	No	Yes	Yes	No	No	No	Yes	No	No	Yes	No	No	No	Yes	Yes	Yes	No	Yes	Yes	No	Yes	No	Yes	No	Yes	Yes	Yes	Yes	Yes	Yes	Yes	Yes	No	Yes
Fever	Yes	Yes	Yes	No	No	No	Yes	Yes	No	Yes	No	No	No	No	No	No	Yes	No	No	No	No	No	No	Yes	No	No	No	No	Yes	No	No	Yes	No	Yes	No	No	Yes	No	Yes	No	No	No	Yes	No
Costal chondritis	No	No	No	No	No	No	No	No	No	Yes	No	No	No	No	No	No	Yes	No	No	Yes	No	No	No	No	Yes	No	No	No	Yes	No	No	No	No	No	No	No	Yes	No	No	No	No	No	No	No
Skin rash	Yes	Yes	No	No	No	No	No	No	No	No	No	No	No	No	No	No	No	No	No	No	No	No	No	No	No	No	Yes	No	No	No	No	No	No	No	No	No	No	No	No	No	No	No	No	No
Neurological involvement	No	No	No	No	No	No	No	No	No	No	No	No	No	No	Yes	No	No	No	No	No	No	No	No	No	No	No	No	No	No	No	No	No	No	No	No	No	No	No	No	No	No	No	No	No
Cardiac involvement	No	No	No	No	No	No	No	No	No	No	No	No	No	No	No	No	No	No	No	Yes	No	No	Yes	No	No	Yes	No	No	No	No	No	No	No	No	No	No	No	No	No	No	No	Yes	No	No
Macrocytic anemia	Yes	Yes	No	No	No	No	No	No	No	No	No	No	No	No	No	No	No	No	No	No	No	No	No	No	No	No	No	No	No	No	No	No	No	No	No	No	No	No	No	No	No	No	No	No
CBC (normal range)
WBC, ×109/L (3.5-9.5)	3.14	21.9	9.31	7.1	8.1	4.6	9.2	4.8	6.56	10.03	5.56	7.45	8.71	5.62	7.7	12.8	7.81	9.61	9.51	12.07	6.16	4.3	5.7	9.78	8.02	9.8	11.9	6.66	7.52	11.12	3.37	16.28	7.85	10.35	9.13	13.02	9.19	19.13	8.6	9.56	7.37	8.31	6.17	8.83
RBC,×1012/L (4.3-5.8)	2.02	2.14	4.36	4.33	4.67	4.2	3.99	3.7	3.84	4.37	3.99	3.86	4.24	4.81	4.37	5.6	4.25	4.58	4.64	4.68	4.82	3.91	4.94	4.8	2.76	4.13	5.02	4.79	4.56	4.77	3.11	3.14	4.17	4.6	3.43	5.32	4.8	4.49	5.21	3.99	4.46	4.22	4.44	4.23
Hemoglobin, g/L	69	64	138.6	128	139.1	116	130.4	120	124.1	139.4	118	137.5	135	161	146	160	127	139	141	143	126	97	148	143	77	127	157	142.8	128	151	82	77	106	141	109	155	142	136	147	116	99	125	123	114
(130-175)
MCV, fL (82-100)	103.5	121	94.03	90.7	90.87	83	96.77	97.2	96.79	96.05	86.9	106	98.9	100.7	97.8	84.8	93.5	92.5	90.61	92.1	78.53	79.3	92.7	87.1	90.2	95.2	91.9	86.92	90.8	91.6	82.7	81.8	80.5	92.4	97.1	87.6	90.7	93	85.8	91.1	71.8	87.8	85.3	82.6
Platelets ×109/L	125	42	330	396	214	277	222	199	221	188	229	202	321	252	140	341	315	269	251	327	288	335	179	333	396	186	221	272	200	197	337	583	280	229	369	318	317	511	299	316	316	298	173	233
(125-350)
ANC, ×109/L (1.8-6.3)	2.4	20.74	6.17	4.35	4.09	2.42	6.6	2.52	5.01	5.62	3.21	6.3	6.67	3.11	5.61	7.6	6.08	4.02	6.68	9.43	2.78	2.57	3.56	8.4	4.76	8.8	10.75	4.41	6.84	10.24	1.91	12.75	5.95	7.86	8.72	10.53	6.07	14.37	6.11	6.37	4.35	5.44	5.07	5.8
Laboratory (normal range)
C-reactive protein,	51.98	262.44	15.79	10.79	＜1.5	＜3.14	7.66	＜1	10.6	＜3.14	＜1.5	3.89	3.6	＜1.5	＜3.14	＜3.14	43.51	＜1	＜1	19.81	＜3.14	41.39	12.47	27.1	125.97	＜1.5	＜1.5	8.25	＜1	＜1	23.22	41.48	24.46	4.44	82.67	＜1.5	10.4	25.97	31.66	6.79	25.71	3.05	＜1.5	7.12
mg/L(0-10)
ESR, mm/h (0-20)	127	84	35	31	11	14	12	5	17	4	7	4	6	5	1	7	39	3	5	18	3	102	13	13	117	4	5	10	3	2	102	93	78	11	81	2	5	23	24	33	8	15	9	14
M, male; F, female; CBC, complete blood count; WBC, white blood cell; RBC, red blood cell; MCV, mean corpuscular volume; ANC, absolute neutrophil count; ESR, erythrocyte sedimentation rate.
