# Supplementary material for: Dynamic monitoring of UBA1 somatic mutations in patients with relapsing polychondritis
Source: Orphanet J Rare Dis. 2024 Jan 2;19:1. doi: 10.1186/s13023-023-03003-x (PMC10762806; doi:10.1186/s13023-023-03003-x)
Supplement: Supplementary file 3 — Additional file 3. Pathogenic variants detected by droplet digital PCR (ddPCR). [file 13023_2023_3003_MOESM3_ESM.xls]

## Sheet: Sheet1
Additional file 3. Pathogenic variants detected by droplet digital PCR (ddPCR)
Patient ID	sampling times at different time‐points	Sanger	Target variant	Variant copies/20 ul well	Wild-type copies/20 ul well	Accepted droplet/20 ul well	FA%
RP01		-	1	0	6449.7	20150	0
RP01		-	2	0	7799.5	17137	0
RP01		-	3	0	7139.9	16284	0
RP02		-	1	0	12864.4	16376	0
RP02		-	2	0	14839.3	17667	0
RP02		-	3	0	14005.6	19395	0
RP03	the first sampling	-	1	0	18199.2	16417	0
RP03		-	2	0	17699.4	17449	0
RP03		-	3	0	17562.9	17173	0
RP03	the second sampling (five months later)	-	1	0	28647.9	17766	0
RP03		-	2	0	28185.5	17851	0
RP03		-	3	0	21336.1	19417	0
RP04		-	1	0	18631	16103	0
RP04		-	2	0	19878.9	17285	0
RP04		-	3	0	21137.6	16845	0
RP05	the first sampling	-	1	0	25099	16534	0
RP05		-	2	0	22500.7	16965	0
RP05		-	3	0	24047.6	15025	0
RP05	the second sampling (five months later)	-	1	0	17686.7	17412	0
RP05		-	2	0	19458.1	18067	0
RP05		-	3	0	19021.9	18873	0
RP05	the third sampling (five months later)	-	1	0	16242.1	19923	0
RP05		-	2	0	22552.3	17576	0
RP05		-	3	0	22884.7	18556	0
RP06		-	1	0	12111.5	16128	0
RP06		-	2	0	11292.7	18351	0
RP06		-	3	4.1	12049.8	17042	0
RP07		-	1	0	12928.6	16788	0
RP07		-	2	0	12630.3	17885	0
RP07		-	3	0	13134.9	16097	0
RP08	the first sampling	-	1	0	17837.1	17020	0
RP08		-	2	0	18709	18008	0
RP08		-	3	0	18078.1	13616	0
RP08	the second sampling (four months later)	-	1	0	17283.4	18865	0
RP08		-	2	0	17802.5	16816	0
RP08		-	3	1.3	14244.8	17741	0.01
RP09	the first sampling	c.121T>C	3	7929.1	2822.1	19075	73.75
RP09	the second sampling (two months later)	c.121T>C	3	3309.4	2091.4	17202	61.28
RP09	the third sampling (one month later)	c.121T>C	3	12140.2	6534.1	19334	65.01
RP09	the fourth sampling (two months later)	-	1	0	8014.3	18132	0
RP09		-	2	0	12964.3	18885	0
RP09		c.121T>C	3	10716.9	3758	17417	74.04
RP10		-	1	0	8966.8	18824	0
RP10		-	2	0	8579	18620	0
RP10		-	3	0	9239.6	18226	0
RP11		-	1	0	8252.1	18417	0
RP11		-	2	0	8745	18237	0
RP11		-	3	0	9494.8	18591	0
RP12	the first sampling	-	1	0	19344.7	17318	0
RP12		-	2	0	19095	19418	0
RP12		-	3	0	20313.6	17062	0
RP12	the second sampling (nine months later)	-	1	0	152.6	19801	0
RP12		-	2	0	263.2	19867	0
RP12		-	3	0	393.8	18737	0
RP13		-	1	0	11034.7	17665	0
RP13		-	2	0	11320.4	19578	0
RP13		c.121T>C	3	13789.6	1799.1	24303	88.46
RP14		-	1	0	8517.7	17312	0
RP14		-	2	0	8912.8	18350	0
RP14		-	3	0	8927.6	16678	0
RP15		-	1	0	6439.6	18323	0
RP15		-	2	0	6758	18510	0
RP15		-	3	0	6959.5	18727	0
RP16	the first sampling	-	1	0	12347.5	17864	0
RP16		-	2	0	12276	18290	0
RP16		-	3	0	11636.6	18613	0
RP16	the second sampling (two months later)	-	1	0	16991.4	18480	0
RP16		-	2	0	20019.5	17309	0
RP16		-	3	0	18933.9	16978	0
RP16	the third sampling (six months later)	-	1	0	30894.9	17063	0
RP16		-	2	0	33678.7	17775	0
RP16		-	3	0	29619.9	17973	0
RP17		-	1	0	12265.6	17679	0
RP17		-	2	0	12078.5	19417	0
RP17		-	3	0	13319.3	19586	0
RP18		-	1	0	5048.2	18540	0
RP18		-	2	0	5181	17851	0
RP18		-	3	0	6265.6	18128	0
RP19		-	1	0	4943	17585	0
RP19		-	2	0	6676.2	17892	0
RP19		-	3	0	7399	19050	0
RP20		-	1	0	5315	18260	0
RP20		-	2	0	5339.1	18206	0
RP20		-	3	0	6050.8	17693	0
RP21		-	1	0	28132.3	15381	0
RP21		-	2	0	27470.7	16478	0
RP21		-	3	0	29361.3	17073	0
RP22		-	1	0	11444.5	18408	0
RP22		-	2	0	10345.1	12402	0
RP22		-	3	0	12804.7	17458	0
RP23	the first sampling	-	1	0	27928.7	18660	0
RP23		-	2	0	28680.1	18758	0
RP23		-	3	0	27066.3	18952	0
RP23	the second sampling (two months later)	-	1	0	17447.7	19988	0
RP23		-	2	0	19729.5	16757	0
RP23		-	3	0	19241.8	17000	0
RP24		-	1	0	22248.5	18980	0
RP24		-	2	0	21819	17795	0
RP24		-	3	0	20424.8	17007	0
RP25		-	1	0	10986	18946	0
RP25		-	2	1.3	11622	18177	0.01
RP25		-	3	0	11203.9	16606	0
RP26		-	1	0	1913.8	18037	0
RP26		-	2	0	2054.5	17605	0
RP26		-	3	0	1751.3	19825	0
RP28		-	1	0	20458.1	18181	0
RP28		-	2	0	19999	19196	0
RP28		-	3	0	20238.4	18532	0
RP29		-	1	0	11527.2	18308	0
RP29		-	2	0	11767.4	17025	0
RP29		-	3	0	9017.2	17236	0
RP30		-	1	0	21480.9	17282	0
RP30		-	2	0	19503.4	18592	0
RP30		-	3	0	18823.1	18919	0
RP31	the first sampling	-	1	0	15903.6	18972	0
RP31		-	2	0	19113.7	17480	0
RP31		-	3	0	27529.6	18794	0
RP31	the second sampling (two months later)	-	1	0	30021.3	19235	0
RP31		-	2	0	27118.5	19887	0
RP31		-	3	0	25884.2	16374	0
RP32		-	1	0	10932.7	18666	0
RP32		-	2	0	12616.1	19329	0
RP32		-	3	0	12613.9	16888	0
RP33		-	1	0	19553.3	18721	0
RP33		-	2	0	16395.9	19058	0
RP33		-	3	0	15649.9	16818	0
RP34	the first sampling	-	1	0	13913.5	15869	0
RP34		-	2	0	12843.6	12212	0
RP34		-	3	1.5	13789.2	15550	0.01
RP34	the second sampling (two weeks later)	-	1	0	10922.3	17040	0
RP34		-	2	0	10502.4	18334	0
RP34		-	3	0	11270.7	17123	0
RP34	the third sampling (two months later)	-	1	0	7022.3	16467	0
RP34		-	2	0	7082.4	18313	0
RP34		-	3	61.5	5950	17621	1.02
RP35		-	1	0	8529.5	20002	0
RP35		-	2	0	9299.4	19527	0
RP35		-	3	0	8539.8	16506	0
RP36	the first sampling	-	1	0	23846.1	18991	0
RP36		-	2	0	22380.3	19726	0
RP36		-	3	0	21371.9	16840	0
RP36	the second sampling (one month later)	-	1	0	22726.9	19404	0
RP36		-	2	0	27316.2	19132	0
RP36		-	3	0	25359.3	17902	0
RP37		-	1	0	9188.3	19602	0
RP37		-	2	0	10766.1	19661	0
RP37		-	3	0	10576.9	15953	0
RP38		-	1	0	28140.6	19305	0
RP38		-	2	0	28507.1	14701	0
RP38		-	3	0	28866.3	18225	0
RP39		-	1	0	11961.7	18719	0
RP39		-	2	0	13238.2	18655	0
RP39		-	3	1.3	12576.7	18783	0.01
RP40	the first sampling	-	1	0	15577.8	19539	0
RP40		-	2	0	17234.9	16099	0
RP40		-	3	1.2	17436.5	19028	0.01
RP40	the second sampling (one month later)	-	1	0	11869.2	18008	0
RP40		-	2	0	12725.1	16980	0
RP40		-	3	0	10672	13992	0
RP41		-	1	0	29210	19379	0
RP41		-	2	0	29840.1	18110	0
RP41		-	3	0	30830.9	17380	0
RP42		-	1	0	23126.1	18742	0
RP42		-	2	0	27661.5	19282	0
RP42		-	3	0	28042.3	18365	0
RP43		-	1	0	19313.8	18211	0
RP43		-	2	0	19417.8	13357	0
RP43		-	3	0	19469.2	18199	0
RP44		-	1	0	24732.5	17171	0
RP44		-	2	0	24668.3	15595	0
RP44		-	3	0	25061.4	17259	0
Target variants 1, 2, and 3 correspond to c.121A>C, c.121A>G, and c.122T>C, respectively.
