# Supplementary material for: Dynamic monitoring of UBA1 somatic mutations in patients with relapsing polychondritis
Source: Orphanet J Rare Dis. 2024 Jan 2;19:1. doi: 10.1186/s13023-023-03003-x (PMC10762806; doi:10.1186/s13023-023-03003-x)
Supplement: Supplementary file 4 — Additional file 4. Variant allele ratios detected by droplet digital PCR (ddPCR). [file 13023_2023_3003_MOESM4_ESM.xls]

## Sheet: Sheet1
Additional file 4. Variant allele ratios detected by droplet digital PCR (ddPCR)
Variant allele radio	Variant copies/well	Wild-type copies/well	Accepted droplet/well	FA％	FA-range
0.2	2675.1	23881	17540	10.1	9.63-10.5
0.2	2743.1	23496	18211	10.5	10-10.9
0.1	1131.2	27360	16682	3.97	3.69-4.25
0.1	1166.8	25948	16970	4.3	4.01-4.6
0.05	540.7	28393	17210	1.87	1.68-2.05
0.05	523.9	27496	16711	1.87	1.68-2.06
0.01	114.5	30748	17101	0.371	0.291-0.451
0.01	109.5	29585	16800	0.369	0.287-0.451
0.005	50.1	29685	16921	0.169	0.113-0.224
0.005	55.3	29598	17893	0.186	0.13-0.243
0.0025	33.1	30354	18481	0.109	0.0668-0.151
0.0025	34.1	30607	16580	0.111	0.0663-0.156
0.001	14.6	28227	17756	0.0516	0.0206-0.0827
0.001	16.8	29861	16810	0.0562	0.0239-0.0886
0.0005	10.8	30855	17361	0.0351	0.0102-0.0601
0.0005	9.3	31889	17737	0.0291	0.0069-0.0513
0.0001	8.5	33218	19392	0.0256	0.0061-0.045
0.0001	3.6	30419	19581	0.0119	0-0.0262
0	3.8	31376	18626	0.0121	0-0.0267
0	2.9	32262	16500	0.00884	0-0.0223
FA%, fractional abundance.
